# Supplementary material for: Effect of Mulberry Leaf Powder of Varying Levels on Growth Performance, Immuno-Antioxidant Status, Meat Quality and Intestinal Health in Finishing Pigs
Source: MDPI journal article supplement (doi:10.3390/antiox11112243), 2022-11-14
Supplement: s1 [file s1]

**Table S2** Composition and nutrient levels of basal diet (% , as-fed basis)

| Item                                 | Ctrl   | 6%MP   | 9%MP   | 12%MP  |
|--------------------------------------|--------|--------|--------|--------|
| Corn, CP 7.6%                        | 74.23  | 69.77  | 68.23  | 66.61  |
| Soybean meal, CP 43.6%               | 11.78  | 11.16  | 10.60  | 10.12  |
| Wheat bran, CP 17.17%                | 10.40  | 9.60   | 8.80   | 8.00   |
| Mulberry Powder                      | 0.00   | 6.00   | 9.00   | 12.00  |
| Soybean oil                          | 0.60   | 0.50   | 0.40   | 0.30   |
| Limestone                            | 0.93   | 0.92   | 0.90   | 0.87   |
| Dicalcium phosphate                  | 0.58   | 0.62   | 0.66   | 0.70   |
| Salt                                 | 0.30   | 0.30   | 0.30   | 0.30   |
| L-Lysine HCl, 78%                    | 0.28   | 0.24   | 0.22   | 0.21   |
| DL-Methionine, 98%                   | 0.03   | 0.04   | 0.04   | 0.05   |
| L-Threonine, 98%                     | 0.09   | 0.07   | 0.07   | 0.06   |
| L-Tryptophan, 98%                    | 0.03   | 0.03   | 0.03   | 0.03   |
| Chromic oxide                        | 0.25   | 0.25   | 0.25   | 0.25   |
| Premix <sup>1</sup>                  | 0.50   | 0.50   | 0.50   | 0.50   |
| Total                                | 100.00 | 100.00 | 100.00 | 100.00 |
| <b>Nutritional level (Caculated)</b> |        |        |        |        |
| Digestive energy, MJ/kg              | 14.26  | 14.26  | 14.26  | 14.26  |
| Crude protein                        | 13.27  | 13.09  | 12.88  | 12.70  |
| Lysine                               | 0.83   | 0.83   | 0.83   | 0.83   |
| Methionine                           | 0.26   | 0.26   | 0.26   | 0.26   |
| Threonine                            | 0.57   | 0.57   | 0.57   | 0.57   |
| Calcium                              | 0.58   | 0.58   | 0.58   | 0.58   |
| Total phosphorus                     | 0.46   | 0.46   | 0.46   | 0.46   |
| <b>Nutritional level (Analyzed)</b>  |        |        |        |        |
| Gross energy, MJ/kg                  | 16.01  | 16.02  | 15.97  | 16.06  |
| Crude protein                        | 12.89  | 12.54  | 12.31  | 11.88  |
| Ether extract                        | 3.84   | 3.71   | 3.32   | 3.35   |
| Organic matter                       | 95.91  | 95.44  | 95.25  | 95.13  |

<sup>1</sup> Premix provided the following per kg of diets: vitamin A (retinyl acetate), 8,250 IU; vitamin D<sub>3</sub> (cholecalciferol), 825 IU; vitamin E (DL-alpha-tocopheryl acetate), 40 IU; vitamin K<sub>3</sub> (menadione nicotinamide bisulfite), 4.0 mg; vitamin B<sub>1</sub> (thiamine mononitrate), 1.0 mg; riboflavin, 5.0 mg; vitamin B<sub>5</sub> (DL-calcium pantothenate), 15 mg; vitamin B<sub>6</sub> (pyridoxine hydrochloride), 2.0 mg; vitamin

---

B<sub>12</sub>, 25 µg; niacin, 35 mg; folacin, 2 mg; biotin, 4 mg; choline chloride, 600 mg; Mn (MnO), 25 mg; Fe (FeSO<sub>4</sub>·H<sub>2</sub>O), 80 mg; Zn (ZnSO<sub>4</sub>), 100 mg; Cu (CuSO<sub>4</sub>·5H<sub>2</sub>O), 50 mg; I (KI), 0.5 mg; Se (Na<sub>2</sub>SeO<sub>3</sub>), 0.15 mg
