# Supplementary material for: Effect of Mulberry Leaf Powder of Varying Levels on Growth Performance, Immuno-Antioxidant Status, Meat Quality and Intestinal Health in Finishing Pigs
Source: MDPI journal article supplement (doi:10.3390/antiox11112243), 2022-11-14
Supplement: s1 [file s1]

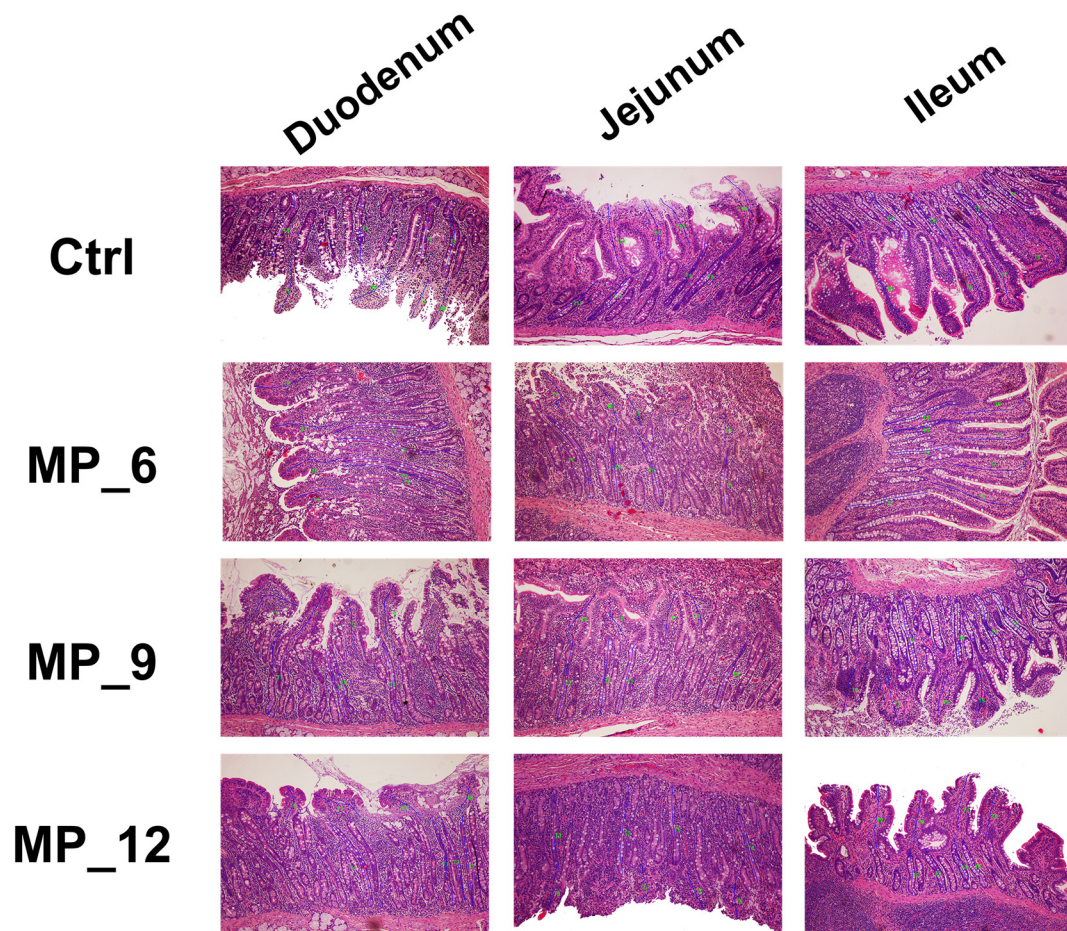

**Figure S2.** The photomicrograph of intestinal morphology in finishing pigs dietary supplementation of mulberry leaf powder with varying levels. Ctrl, basal diet with 0% MP; MP\_6, MP\_9, MP\_12, the basal diet supplemented with 6%, 9% and 12% MP, respectively. The images were visualized at 100x magnification and four pairs of villi and crypt were highlighted with blue color.  $n = 3$ .
