# Supplementary material for: Effect of Mulberry Leaf Powder of Varying Levels on Growth Performance, Immuno-Antioxidant Status, Meat Quality and Intestinal Health in Finishing Pigs
Source: MDPI journal article supplement (doi:10.3390/antiox11112243), 2022-11-14
Supplement: s1 [file s1]

---

**Table S1.** Nutrient composition of **mulberry leaf powder** (% , as-fed basis)

| Item                    | Mulberry powder |
|-------------------------|-----------------|
| Dry matter              | 94.23           |
| Crude protein           | 19.64           |
| Ether extract           | 5.20            |
| Crude fiber             | 34.44           |
| Neutral detergent fiber | 34.90           |
| Acid detergent fiber    | 21.60           |
| Organic matter          | 89.97           |
| <b>Gross energy</b>     | 17.39           |
| Calcium                 | 1.64            |
| Phosphorus              | 0.26            |
| Aspartic acid           | 1.12            |
| Glutamic acid           | 1.35            |
| Threonine               | 0.51            |
| Serine                  | 0.46            |
| Proline                 | 0.49            |
| Glycine                 | 0.60            |
| Alanine                 | 0.66            |
| Cysteine                | 0.07            |
| Valine                  | 0.64            |
| Methionine              | 0.03            |
| Isoleucine              | 0.51            |
| Leucine                 | 0.95            |
| Tyrosine                | 0.32            |
| Phenylalanine           | 0.58            |
| Histidine               | 0.54            |
| Lysine                  | 0.80            |
| Arginine                | 0.55            |
| Tryptophan              | 0.10            |

---
