# Supplementary material for: Effect of Mulberry Leaf Powder of Varying Levels on Growth Performance, Immuno-Antioxidant Status, Meat Quality and Intestinal Health in Finishing Pigs
Source: MDPI journal article supplement (doi:10.3390/antiox11112243), 2022-11-14
Supplement: s1 [file s1]

**Table S3.** Primer sequences of housekeeping and target genes related with intestinal tight junction and muscle antioxidant capacity

| Genes                           | Sequences (5' - 3')                                        | Size (bp) |
|---------------------------------|------------------------------------------------------------|-----------|
| <i>Occludin</i>                 | F: ATGCTTTCTCAGCCAGCGTA<br>R: AAGGTTCCATAGCCTCGGTC         | 176       |
| <i>Claudin-1</i>                | F: CAAAACCTTCGCCTTCCAG<br>R: TCCCCACATTGAGATGATTAC         | 293       |
| <i>ZO-1</i>                     | F: GAGGATGGTCACACCGTGGT<br>R: GGAGGATGCTGTTGTCTCGG         | 169       |
| <i>Mucin-2</i>                  | F: CGGCTCTCCAGTCTACTCGTCTAA<br>R: TGGTTGTCGGGCAAGTTGATGA   | 204       |
| <i>SOD1</i>                     | F: GAGACCTGGGCAATGTGACTG<br>R: GCCAAACGACTTCCAGCAT         | 190       |
| <i>GPX1</i>                     | F: CAGGCGGCGGGTTTCG<br>R: TGAGGGCAGTGGCATCGT               | 129       |
| <i>Hmox1</i>                    | F: TGGTCTCTTGACTGGCTTCCTTGT<br>R: GCTTCTGGCTGGCTCCATTCTC   | 245       |
| <i>NFE2L2</i>                   | F: TTCTAAGAGGTCTGCTGGCATCAC<br>R: CTGCGAGCTACACCACAGTTCAT  | 106       |
| <i>MyHC I</i>                   | F: CCGAGAAGGATGAGGAGATGGAAC<br>R: ATGCGATTGGCGTGGCTGAG     | 175       |
| <i>MyHC IIa</i>                 | F: ACCTACAGCACCGTCTGGATGA<br>R: GCTCACTCTCAACCTCTCCTTCC    | 114       |
| <i>MyHC IIx</i>                 | F: CCTGGAGCGGATGAAGAAGAACCT<br>R: CTCGTGTTTGCGTAGACCCTTGAC | 199       |
| <i>PGC1a</i>                    | F: ACAGACTCAGACCAGTGCTACCT<br>R: GGATGACCGAAGTGCTTGTTTCAG  | 128       |
| <i>Nrf2</i>                     | F: ACCTGTGCCTGCTGGATTGAGA<br>R: GGTTTCGTTACCACTGAGCCATAGC  | 162       |
| <i>UCP1</i>                     | F: TTGTACCTTCCTTCTGGTGACTGG<br>R: CTGCCGTGACTCCATCAACTCTT  | 138       |
| <i>HSL</i>                      | F: TCGTGAAAGGACAGGACAGTGA<br>R: AGGTAAGGCTCGTGGGATTTGGA    | 172       |
| <i>ChREBP</i>                   | F: GGCACCCTTGGCAAACCTTTATAG<br>R: AACTCCGTTCTTCCTGGCTTCTG  | 136       |
| <i>PPAR<math>\gamma</math></i>  | F: CCAACGGCATCCAGAACAAGGAG<br>R: AACTCCGTTCTTCCTGGCTTCTG   | 193       |
| <i><math>\beta</math>-actin</i> | F: TACGCCAACACGGTGCTGTC<br>R: GTACTCCTGCTTGCTGATCCACAT     | 207       |

F, forward primer; R, Reverse primer; ZO-1, zonula occludens-1; SOD1, superoxide dismutase; GPX1, glutathione peroxidase 1; Hmox1, heme oxygenase 1; NFE2L2, nuclear factor erythroid 2-like 2; MyHC1, myosin heavy chain 1; MyHC IIa, myosin heavy chain IIa; MyHC IIx myosin heavy chain IIx; PGC-1 $\alpha$ , peroxisome proliferator-activated receptor  $\gamma$  coactivator-1 $\alpha$ ; Nrf2, nuclear respiratory factor; UCP1, uncoupling protein-1; HSL, hormone-sensitive lipase; ChREBP, carbohydrate response element binding protein; PPAR $\gamma$ , peroxisome proliferator-activated receptor  $\gamma$ .
