# Supplementary material for: Effect of Mulberry Leaf Powder of Varying Levels on Growth Performance, Immuno-Antioxidant Status, Meat Quality and Intestinal Health in Finishing Pigs
Source: Antioxidants (Basel). 2022 Nov 14;11(11):2243. doi: 10.3390/antiox11112243 (PMC9687140; doi:10.3390/antiox11112243)
Supplement: Supplementary file 1 [file antioxidants-11-02243-s001.zip]

Archive with 5 entries (5 files):
- Antioxidants Figure S1.pdf
- Antioxidants-Figure S2.pdf
- Antioxidants-Table S1.pdf
- Antioxidants-Table S2.pdf
- Antioxidants-Table S3.pdf
